# Supplementary material
Source: Springer Nature journal article supplement (http://www.springermedizin.de/resource/supplementary/12955_2009_585_MOESM5_ESM.pdf/9560762)

Health Status Questionnaire  
Physical Function Component Score

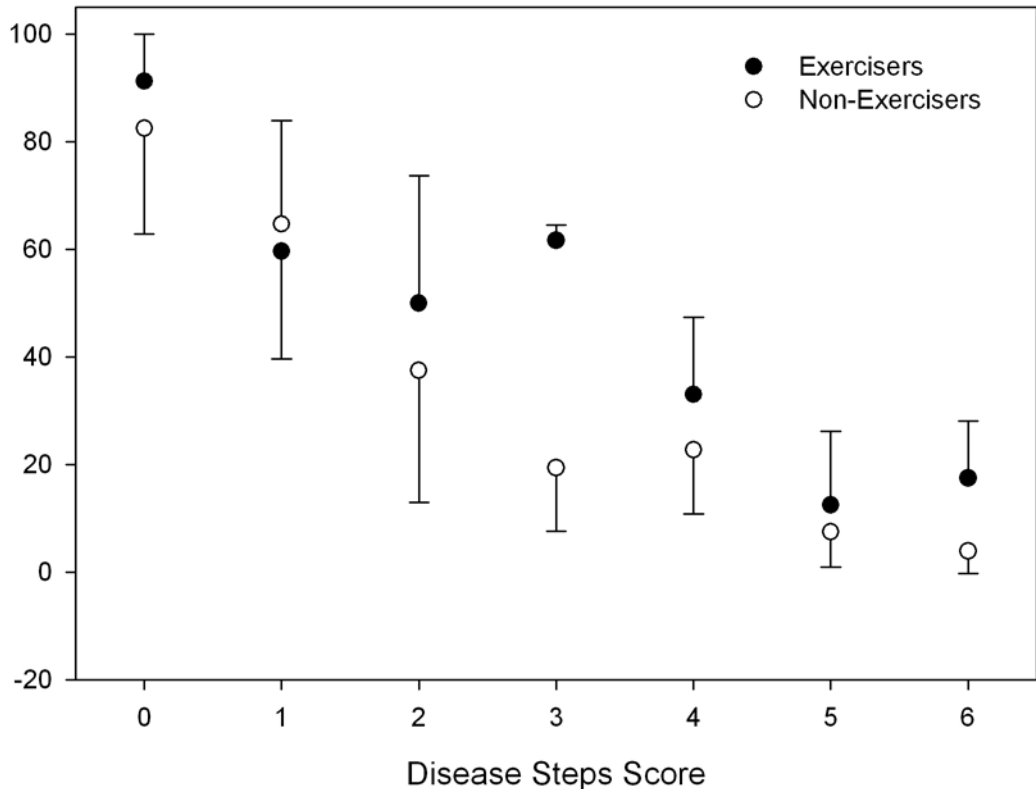

Supplement: MOESM5 [file 9560762]
